# Supplementary material for: Translation and Cross-Cultural Adaptation of the International Questionnaire to Measure the Use of Complementary and Alternative Medicine (I-CAM-Q) for the Polish and Cross-Sectional Study
Source: MDPI journal article supplement (doi:10.3390/ijerph20010124), 2022-12-22
Supplement: s1 [file s1]

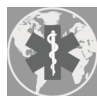

Supplementary Materials

# Translation and Cross-Cultural Adaptation of the International Questionnaire to Measure the Use of Complementary and Alternative Medicine (I-CAM-Q) for the Polish and Cross-Sectional Study

Aneta Brygida Jędrzejewska, Barbara Janina Ślusarska, Krzysztof Jurek and Grzegorz Józef Nowicki

**Table S1.** The list of thematic groups on Facebook.

| Group name                                                                           | Number of members (in thous.) |
|--------------------------------------------------------------------------------------|-------------------------------|
| 1. CUKRZYCA   Grupa mojacukrzyca.org                                                 | 28.7                          |
| 2. CUKRZYCA 24H INFO                                                                 | 29.9                          |
| 3. DIABETYCY                                                                         | 10                            |
| 4. Jelita - to się leczy                                                             | 3                             |
| 5. Wrzodziejące Zapalenia Jelit (Colitis Ulcerosa)                                   | 4.2                           |
| 6. Zdrowe jelita Zdrowi my - IBS, SIBO, Low Fodmap                                   | 9.7                           |
| 7. Zespół Jelita Drażliwego - nasze zmagania                                         | 10                            |
| 8. Jelita - Centrum Zdrowia                                                          | 11                            |
| 9. Depresja, Stany Lękowe, Ataki Paniki, Fobie. Grupa integracyjna                   | 43.7                          |
| 10. Abstynenci                                                                       | 24.7                          |
| 11. Rzucam palenie. Grupa wsparcia                                                   | 72.2                          |
| 12. Łuszczyca / Psoriasis Grupa Wsparcia                                             | 9.7                           |
| 13. Łuszczyca z innej perspektywy.                                                   | 16                            |
| 14. Reumatyzm, zapalenie stawów, RZS, ŁZS, Fibromialgia, ZZSK, Dna moczaniowa        | 24                            |
| 15. Dermatologia - walczymy o zdrową skórę                                           | 30.7                          |
| 16. Alergia - Poważni Alergicy                                                       | 4.1                           |
| 17. Choroby Tarczycy   Hashimoto   Niedoczynność   Dieta   Wsparcie                  | 34.7                          |
| 18. Nadczynność Tarczycy Gravesa-Basedowa                                            | 5.5                           |
| 19. Atopowe Zapalenie Skóry Alergia, AZS grupa wsparcia dla rodziców                 | 48.5                          |
| 20. Lekarze, pacjenci, szpitale, ratownictwo /OCHRONA ZDROWIA - wiadomości, dyskusje | 23.8                          |
| 21. Kosmetolodzy, kosmetyczki, lekarze-opinie                                        | 90.9                          |
| 22. Jak będzie w szpitalu? - sekcja medyczna - miesiąc stanu wyjątkowego             | 21                            |
| 23. COVID-19 - Koronawirus - grupa wsparcia dla pozytywnych i ozdrowieńców.          | 8.9                           |

|     |                                                                             |       |
|-----|-----------------------------------------------------------------------------|-------|
| 24. | Pielęgniarki/ Pielęgniarze - najlepszy zawód :)                             | 69    |
| 25. | Grupa Pielęgniarki Cyfrowe                                                  | 12.2  |
| 26. | Badania naukowe – organizatorzy i badani                                    | 4.1   |
| 27. | Wypełniamy ankiety - do prac dyplomowych, licencjackich, magisterskich      | 13    |
| 28. | Ankiety- chętnie pomogę wypełnić                                            | 24    |
| 29. | Badania, ankiety, wywiady                                                   | 5.9   |
| 30. | BTW   BEZ TABU WSZYSCY                                                      | 103.8 |
| 31. | Medyczna marihuana w Polsce                                                 | 15.3  |
| 32. | "Homeopatia Polska"- klasyczna, kliniczna. Odrzuwanie Homeo. Porady online. | 30.5  |
| 33. | Dieta wg Medycyny Chińskiej - Porady                                        | 13.8  |
| 34. | Zioła i Terapie Naturalne                                                   | 37    |
| 35. | Naturalne metody leczenia –zioła- alternatywne metody - Wiedza o zdrowiu    | 62.5  |
| 36. | Wylecz się Ziołami (Zioła, Naturalne metody leczenia, Porady, Natura)       | 159   |
| 37. | Grupa Stawianie Baniek                                                      | 46.2  |
| 38. | TCM Medycyna Chińska dla każdego                                            | 4.7   |

8

9

10

11

12

13

14

15

16

17

18

19

20

21

22

23

24

Table S2. STROBE Statement—Checklist.

25

|                           | Item No | Recommendation                                                                                                                                                                                     | Page |
|---------------------------|---------|----------------------------------------------------------------------------------------------------------------------------------------------------------------------------------------------------|------|
| Title and abstract        | 1       | (a) Indicate the study’s design with a commonly used term in the title or the abstract                                                                                                             | 1    |
|                           |         | (b) Provide in the abstract an informative and balanced summary of what was done and what was found                                                                                                | 1    |
| Introduction              |         |                                                                                                                                                                                                    |      |
| Background/rationale      | 2       | Explain the scientific background and rationale for the investigation being reported                                                                                                               | 1-2  |
| Objectives                | 3       | State specific objectives, including any prespecified hypotheses                                                                                                                                   | 2    |
| Methods                   |         |                                                                                                                                                                                                    |      |
| Study design              | 4       | Present key elements of study design early in the paper                                                                                                                                            | 2-6  |
| Setting                   | 5       | Describe the setting, locations, and relevant dates, including periods of recruitment, exposure, follow-up, and data collection                                                                    | 2-6  |
| Participants              | 6       | (a) Give the eligibility criteria, and the sources and methods of selection of participants                                                                                                        | 2-6  |
| Variables                 | 7       | Clearly define all outcomes, exposures, predictors, potential confounders, and effect modifiers. Give diagnostic criteria, if applicable                                                           | 2-6  |
| Data sources/ measurement | 8*      | For each variable of interest, give sources of data and details of methods of assessment (measurement). Describe comparability of assessment methods if there is more than one group               | 2-6  |
| Bias                      | 9       | Describe any efforts to address potential sources of bias                                                                                                                                          | 2-6  |
| Study size                | 10      | Explain how the study size was arrived at                                                                                                                                                          | 2-6  |
| Quantitative variables    | 11      | Explain how quantitative variables were handled in the analyses. If applicable, describe which groupings were chosen and why                                                                       | 2-6  |
| Statistical methods       | 12      | (a) Describe all statistical methods, including those used to control for confounding                                                                                                              | 6    |
|                           |         | (b) Describe any methods used to examine subgroups and interactions                                                                                                                                | N/A  |
|                           |         | (c) Explain how missing data were addressed                                                                                                                                                        | 2-6  |
|                           |         | (d) If applicable, describe analytical methods taking account of sampling strategy                                                                                                                 | N/A  |
|                           |         | (e) Describe any sensitivity analyses                                                                                                                                                              | N/A  |
| Results                   |         |                                                                                                                                                                                                    |      |
| Participants              | 13*     | (a) Report numbers of individuals at each stage of study—eg. numbers potentially eligible, examined for eligibility, confirmed eligible, included in the study, completing follow-up, and analysed | 7    |
|                           |         | (b) Give reasons for non-participation at each stage                                                                                                                                               | 7    |
|                           |         | (c) Consider use of a flow diagram                                                                                                                                                                 | N/A  |
| Descriptive data          | 14*     | (a) Give characteristics of study participants (eg demographic, clinical, social) and information on exposures and potential confounders                                                           | 7    |

|                          |     |                                                                                                                                                                                                              |      |
|--------------------------|-----|--------------------------------------------------------------------------------------------------------------------------------------------------------------------------------------------------------------|------|
|                          |     | (b) Indicate number of participants with missing data for each variable of interest                                                                                                                          | 7    |
| Outcome data             | 15* | Report numbers of outcome events or summary measures                                                                                                                                                         | N/A  |
| Main results             | 16  | (a) Give unadjusted estimates and, if applicable, confounder-adjusted estimates and their precision (eg, 95% confidence interval). Make clear which confounders were adjusted for and why they were included | 9-14 |
|                          |     | (b) Report category boundaries when continuous variables were categorized                                                                                                                                    | N/A  |
|                          |     | (c) If relevant, consider translating estimates of relative risk into absolute risk for a meaningful time period                                                                                             | N/A  |
| Other analyses           | 17  | Report other analyses done—eg analyses of subgroups and interactions, and sensitivity analyses                                                                                                               | N/A  |
| <b>Discussion</b>        |     |                                                                                                                                                                                                              |      |
| Key results              | 18  | Summarise key results with reference to study objectives                                                                                                                                                     | 14   |
| Limitations              | 19  | Discuss limitations of the study, taking into account sources of potential bias or imprecision. Discuss both direction and magnitude of any potential bias                                                   | 15   |
| Interpretation           | 20  | Give a cautious overall interpretation of results considering objectives, limitations, multiplicity of analyses, results from similar studies, and other relevant evidence                                   | 15   |
| Generalisability         | 21  | Discuss the generalisability (external validity) of the study results                                                                                                                                        | N/A  |
| <b>Other information</b> |     |                                                                                                                                                                                                              |      |
| Funding                  | 22  | Give the source of funding and the role of the funders for the present study and, if applicable, for the original study on which the present article is based                                                | 16   |

\*Give information separately for exposed and unexposed groups.

**Note:** An Explanation and Elaboration article discusses each checklist item and gives methodological background and published examples of transparent reporting. The STROBE checklist is best used in conjunction with this article (freely available on the Web sites of PLoS Medicine at <http://www.plosmedicine.org/>, Annals of Internal Medicine at <http://www.annals.org/>, and Epidemiology at <http://www.epidem.com/>). Information on the STROBE Initiative is available at [www.strobe-statement.org](http://www.strobe-statement.org).

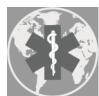

**Table S3.** The results of the agreement in the assessment of the individual items of the I-CAM-Q scale by the experts using the Delphi method.

49  
50

| Items     |                                                                            | M ± SD     | Cons. |
|-----------|----------------------------------------------------------------------------|------------|-------|
| Round one |                                                                            |            |       |
| 1.        | Visiting health care providers:                                            | 2.2 ± 0.98 | 10%   |
| +         | -                                                                          | -          | -     |
| 1.1.      | Physician                                                                  | 3.9 ± 0.3  | 90%   |
| +         | -                                                                          | -          | -     |
| 1.2.      | Chiropractor                                                               | 4 ± 0      | 100%  |
| 1.3.      | Herbalist                                                                  | 3 ± 1.26   | 60%   |
| 1.4.      | Homeopath                                                                  | 4 ± 0      | 100%  |
| 1.5.      | Acupuncturist                                                              | 3.9 ± 0.3  | 90%   |
| 1.6.      | Spiritual healer                                                           | 3.9 ± 0.3  | 90%   |
| 1.7.      | <i>Znachor</i>                                                             | 3.7 ± 0.46 | 70%   |
| 2.        | Complementary treatments received from physicians:                         | 4 ± 0      | 100%  |
| 2.1.      | Manipulation                                                               | 3.9 ± 0.3  | 90%   |
| 2.2.      | Homeopathy                                                                 | 4 ± 0      | 100%  |
| 2.3.      | Acupuncture                                                                | 4 ± 0      | 100%  |
| 2.4.      | Herbs                                                                      | 4 ± 0      | 100%  |
| 2.5.      | Spiritual healing                                                          | 3.8 ± 0.4  | 80%   |
| 2.6.      | Cupping therapy                                                            | 3.9 ± 0.3  | 90%   |
| 3.        | Use of herbal medicine and dietary supplements:                            | 4 ± 0      | 100%  |
| 3.1.      | Herbs/ Herbal medicine                                                     | 3.9 ± 0.3  | 90%   |
| 3.2.      | Vitamins/minerals                                                          | 4 ± 0      | 100%  |
| 3.3.      | Homeopathic remedies                                                       | 2.4 ± 1.2  | 30%   |
| 3.4.      | Other Supplements                                                          | 4 ± 0      | 100%  |
| 4.        | Self help practices:                                                       | 3.9 ± 0.3  | 90%   |
| 4.1.      | Meditation                                                                 | 4 ± 0      | 100%  |
| 4.2.      | Yoga                                                                       | 4 ± 0      | 100%  |
| 4.3.      | Quigong                                                                    | 3.9 ± 0.3  | 90%   |
| 4.4.      | Tai Chi                                                                    | 3.9 ± 0.3  | 90%   |
| 4.5.      | Relaxation techniques                                                      | 4 ± 0      | 100%  |
| 4.6.      | Visualization                                                              | 3.9 ± 0.3  | 90%   |
| 4.7.      | Attended traditional healing ceremony                                      | 3.9 ± 0.3  | 90%   |
| 4.8.      | Praying for own health                                                     | 4 ± 0      | 100%  |
| Round two |                                                                            |            |       |
| 1.        | Visiting practitioners of complementary and alternative medicine:          | 3.9 ± 0.3  | 90%   |
| +         | <i>Medical practitioners of complementary and alternative medicine</i>     | 4 ± 0      | 100%  |
| 1.1.      | Physician                                                                  | 3.9 ± 0.3  | 90%   |
| +         | <i>Non-medical practitioners of complementary and alternative medicine</i> | 3.9 ± 0.3  | 90%   |

|      |                                                    |           |      |
|------|----------------------------------------------------|-----------|------|
| 1.2. | Chiropractor                                       | 4 ± 0     | 100% |
| 1.3. | Herbalist/ Phytotherapist                          | 4 ± 0     | 100% |
| 1.4. | Homeopath                                          | 4 ± 0     | 100% |
| 1.5. | Acupuncturist                                      | 3.9 ± 0.3 | 90%  |
| 1.6. | Spiritual healer                                   | 3.9 ± 0.3 | 90%  |
| 1.7. | <i>Znachor/ Szeptucha</i>                          | 4 ± 0     | 100% |
| 2.   | Complementary treatments received from physicians: | 4 ± 0     | 100% |
| 2.1. | Manipulation                                       | 3.9 ± 0.3 | 90%  |
| 2.2. | Homeopathy                                         | 4 ± 0     | 100% |
| 2.3. | Acupuncture                                        | 3.9 ± 0.3 | 90%  |
| 2.4. | Herbs                                              | 4 ± 0     | 100% |
| 2.5. | Spiritual healing                                  | 3.9 ± 0.3 | 90%  |
| 2.6. | Cupping therapy                                    | 3.9 ± 0.3 | 90%  |
| 3.   | Use of herbal medicine and dietary supplements:    | 4 ± 0     | 100% |
| 3.1. | Herbs/ herbal medicine                             | 3.9 ± 0.3 | 90%  |
| 3.2. | Vitamins/ minerals                                 | 4 ± 0     | 100% |
| 3.3. | Homeopathic medicines                              | 4 ± 0     | 100% |
| 3.4. | Other supplements                                  | 4 ± 0     | 100% |
| 4.   | Self help practices:                               | 3.9 ± 0.3 | 90%  |
| 4.1. | Meditation                                         | 4 ± 0     | 100% |
| 4.2. | Yoga                                               | 4 ± 0     | 100% |
| 4.3. | Quigong                                            | 3.9 ± 0.3 | 90%  |
| 4.4. | Tai Chi                                            | 3.9 ± 0.3 | 90%  |
| 4.5. | Relaxation techniques                              | 4 ± 0     | 100% |
| 4.6. | Visualization                                      | 3.9 ± 0.3 | 90%  |
| 4.7. | Attended traditional healing ceremony              | 3.9 ± 0.3 | 90%  |
| 4.8. | Praying for own health                             | 4 ± 0     | 100% |

M: mean; SD: standard deviation; cons.: consensus obtained.

† - Items added in the second round

51  
52  
53  
54  
55  
56  
57  
58  
59  
60  
61  
62  
63  
64  
65  
66  
67  
68  
69

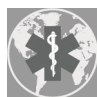

**Table S4.** The frequency, motivation and evaluation of herbal medicine and dietary supplements use in the study group during the last 12 months.

70

| Use of herbal medicine and dietary supplements: | Used <sup>a,#</sup> | Motivation <sup>a,##</sup> |               |                       |           | Missing data | Usefulness of the product <sup>a,##</sup> |           |           |             |              |
|-------------------------------------------------|---------------------|----------------------------|---------------|-----------------------|-----------|--------------|-------------------------------------------|-----------|-----------|-------------|--------------|
|                                                 |                     | Chronic disease            | Acute illness | To improve well-being | Others    |              | Very                                      | Some what | No at all | Do not know | Missing data |
| Herbs / Herbal Medicine:                        |                     |                            |               |                       |           |              |                                           |           |           |             |              |
| Mixtures of herbs                               | 94 (9.4)            | 47 (50.0)                  | 13 (13.8)     | 20 (21.3)             | 13 (13.8) | 1 (1.1)      | 61 (64.9)                                 | 19 (20.2) | 1 (1.1)   | 10 (10.6)   | 3 (3.2)      |
| Herbal dietary supplements                      | 59 (5.9)            | 26 (44.1)                  | 5 (8.5)       | 20 (33.9)             | 8 (13.6)  | 0            | 39 (66.1)                                 | 12 (20.3) | 2 (3.4)   | 5 (8.5)     | 1 (1.7)      |
| Herbal medicinal products                       | 39 (3.9)            | 10 (25.6)                  | 12 (30.8)     | 10 (25.6)             | 5 (12.8)  | 2 (5.1)      | 25 (64.1)                                 | 10 (25.6) | 0         | 2 (5.1)     | 2 (5.1)      |
| Mixtures of Chinese herbs                       | 30 (3.0)            | 15 (50.0)                  | 4 (13.3)      | 11 (36.7)             | 0         | 0            | 16 (53.3)                                 | 14 (46.7) | 0         | 0           | 0            |
| Nettle                                          | 38 (3.8)            | 19 (50.0)                  | 5 (13.2)      | 11 (28.9)             | 2 (5.3)   | 1 (2.6)      | 30 (78.9)                                 | 6 (15.8)  | 0         | 1 (2.6)     | 1 (2.6)      |
| Lemon balm                                      | 34 (3.4)            | 3 (8.8)                    | 4 (11.8)      | 25 (73.5)             | 1 (2.9)   | 1 (2.9)      | 16 (47.1)                                 | 13 (38.2) | 4 (11.8)  | 0           | 1 (2.9)      |
| Ashwagandha                                     | 27 (2.7)            | 8 (29.6)                   | 0             | 16 (59.3)             | 1 (3.7)   | 2 (7.4)      | 14 (51.9)                                 | 10 (37.0) | 0         | 1 (3.7)     | 2 (7.4)      |
| Mint                                            | 26 (2.6)            | 6 (23.1)                   | 7 (26.9)      | 12 (46.2)             | 1 (3.8)   | 0            | 13 (50.0)                                 | 10 (38.5) | 0         | 3 (11.5)    | 0            |
| Milk Thistle                                    | 22 (2.2)            | 11 (50.0)                  | 4 (18.2)      | 6 (27.3)              | 1 (4.5)   | 0            | 14 (63.6)                                 | 5 (22.7)  | 0         | 3 (13.6)    | 0            |
| Dandelion                                       | 21 (2.1)            | 5 (23.8)                   | 5 (23.8)      | 7 (33.3)              | 3 (14.3)  | 1 (4.8)      | 19 (90.5)                                 | 2 (9.5)   | 0         | 0           | 0            |
| CBD oil*                                        | 21 (2.1)            | 13 (61.9)                  | 0             | 8 (38.1)              | 0         | 0            | 16 (76.2)                                 | 5 (23.8)  | 0         | 0           | 0            |
| Salvia                                          | 16 (1.6)            | 2 (12.5)                   | 9 (65.3)      | 4 (25.0)              | 1 (6.3)   | 0            | 10 (62.5)                                 | 6 (37.5)  | 0         | 0           | 0            |
| Cannabis                                        | 16 (1.6)            | 8 (50.0)                   | 4 (25.0)      | 4 (25.0)              | 0         | 0            | 13 (81.3)                                 | 3 (18.8)  | 0         | 0           | 0            |
| St. John's wort                                 | 15 (1.5)            | 5 (33.3)                   | 2 (13.3)      | 7 (46.7)              | 1 (6.7)   | 0            | 13 (86.7)                                 | 2 (13.3)  | 0         | 0           | 0            |
| Black Seed                                      | 15 (1.5)            | 8 (53.3)                   | 4 (26.7)      | 3 (20.0)              | 0         | 0            | 9 (60.0)                                  | 4 (26.7)  | 1 (6.7)   | 1 (6.7)     | 0            |
| Equisetum                                       | 14 (1.4)            | 4 (28.6)                   | 1 (7.1)       | 4 (28.6)              | 5 (35.7)  | 0            | 14 (100)                                  | 0         | 0         | 0           | 0            |
| Chamomile                                       | 12 (1.2)            | 4 (33.3)                   | 1 (8.3)       | 7 (58.3)              | 0         | 0            | 5 (41.7)                                  | 7 (58.3)  | 0         | 0           | 0            |
| Cistus                                          | 11 (1.1)            | 3 (27.3)                   | 0             | 4 (36.4)              | 4 (36.4)  | 0            | 6 (54.5)                                  | 3 (27.3)  | 1 (9.1)   | 1 (9.1)     | 0            |

|                               |            |            |           |           |           |           |            |           |         |           |           |
|-------------------------------|------------|------------|-----------|-----------|-----------|-----------|------------|-----------|---------|-----------|-----------|
| Cleavers                      | 11 (1.1)   | 3 (27.3)   | 1 (9.1)   | 4 (36.4)  | 2 (18.2)  | 1 (9.1)   | 7 (63.6)   | 4 (36.4)  | 0       | 0         | 0         |
| Elderberry                    | 11 (1.1)   | 0          | 4 (36.4)  | 4 (36.4)  | 3 (27.3)  | 0         | 11 (100)   | 0         | 0       | 0         | 0         |
| Bee products                  | 9 (0.9)    | 4 (44.4)   | 3 (33.3)  | 2 (22.2)  | 0         | 0         | 6 (66.7)   | 3 (33.3)  | 0       | 0         | 0         |
| Medicinal mushrooms           | 8 (0.8)    | 6 (75.0)   | 0         | 1 (12.5)  | 1 (12.5)  | 0         | 4 (50.0)   | 2 (25.0)  | 0       | 2 (25.0)  | 0         |
| Other herbs                   | 325 (32.5) | 153 (47.1) | 49 (15.1) | 88 (27.1) | 30 (9.2)  | 5 (1.5)   | 225 (69.2) | 77 (23.7) | 6 (1.8) | 13 (4.0)  | 4 (1.2)   |
| Unspecified by the respondent | 66 (6.6)   | 22 (33.3)  | 4 (6.1)   | 24 (36.4) | 3 (4.5)   | 13 (19.7) | 35 (53.0)  | 14 (21.2) | 3 (4.5) | 2 (3.0)   | 12 (18.2) |
| Not herb/plant                | 60 (6.0)   | 29 (48.3)  | 1 (1.7)   | 22 (36.7) | 5 (8.3)   | 3 (5.0)   | 44 (73.3)  | 13 (21.7) | 0       | 0         | 3 (5.0)   |
| Vitamins / minerals:          |            |            |           |           |           |           |            |           |         |           |           |
| ADEK complex                  | 30 (2.9)   | 11 (36.7)  | 0 (0)     | 10 (33.3) | 9(30.3)   | 0 (0)     | 27 (90.0)  | 2 (6.7)   | 0       | 1 (3.3)   | 0         |
| Vitamin D3                    | 210 (20.0) | 69 (32.9)  | 3 (1.4)   | 87 (41.4) | 46 (21.9) | 5 (2.4)   | 121 (57.6) | 16 (7.6)  | 1 (0.5) | 35 (16.7) | 37 (17.6) |
| Vitamin D3 + K2               | 48 (4.6)   | 20 (41.7)  | 0         | 20 (41.9) | 7 (14.6)  | 1 (2.1)   | 40 (83.3)  | 2 (4.2)   | 0       | 3 (6.3)   | 3 (6.3)   |
| Vitamin C                     | 124 (11.8) | 33 (26.6)  | 12 (9.7)  | 52 (41.9) | 15 (12.1) | 12 (9.7)  | 94 (75.8)  | 9 (7.3)   | 0       | 7 (5.6)   | 14 (11.3) |
| Vitamin B complex             | 68 (6.5)   | 34 (50.0)  | 0         | 30 (44.1) | 3 (4.4)   | 1 (1.5)   | 44 (64.7)  | 7 (10.3)  | 0       | 12 (17.6) | 5 (7.4)   |
| Vitamin B12                   | 32 (3.0)   | 12 (13.7)  | 1 (3.1)   | 10 (31.3) | 8 (25.0)  | 1 (3.1)   | 22 (68.8)  | 2 (6.3)   | 0       | 5 (15.6)  | 3 (9.4)   |
| Vitamin B9                    | 13 (1.2)   | 4 (30.8)   | 1 (7.7)   | 4 (30.8)  | 4 (30.8)  | 0         | 7 (53.8)   | 2 (15.4)  | 0       | 4 (30.8)  | 0         |
| Multivitamins                 | 33 (3.1)   | 6 (18.2)   | 1 (3.0)   | 19 (57.6) | 7 (21.2)  | 0         | 21 (63.6)  | 2 (6.1)   | 0       | 3 (9.1)   | 7 (21.2)  |
| Specific multivitamins        | 36 (3.4)   | 11 (30.6)  | 1 (2.8)   | 11 (30.6) | 12 (33.3) | 1 (2.8)   | 13 (36.1)  | 7 (19.4)  | 0       | 11 (30.6) | 5 (13.9)  |
| Magnesium                     | 123 (11.7) | 45 (36.6)  | 2 (1.6)   | 55 (44.7) | 14 (11.4) | 7 (5.7)   | 76 (61.8)  | 18 (14.6) | 0       | 8 (6.5)   | 21 (17.1) |
| Zinc                          | 54 (5.1)   | 24 (44.4)  | 3 (5.6)   | 16 (29.6) | 9 (16.7)  | 2 (3.7)   | 34 (63.0)  | 11 (20.4) | 1 (1.9) | 5 (9.3)   | 3 (5.6)   |
| Potassium                     | 16 (1.5)   | 9 (56.3)   | 1 (6.3)   | 3 (18.8)  | 3 (18.8)  | 0         | 8 (50.0)   | 5 (31.3)  | 0       | 1 (6.3)   | 2 (12.5)  |
| Selenium                      | 19 (1.8)   | 10 (52.6)  | 0         | 8 (42.1)  | 1 (5.3)   | 0         | 10 (52.6)  | 6 (31.6)  | 0       | 2 (10.5)  | 1 (5.3)   |
| Iron                          | 13 (1.2)   | 9 (69.2)   | 2 (15.4)  | 1 (7.7)   | 0         | 1 (7.7)   | 7 (53.8)   | 2 (15.4)  | 1 (7.7) | 2 (15.4)  | 1 (7.7)   |
| Iodine                        | 12 (1.1)   | 5 (41.7)   | 0         | 3 (25.0)  | 4 (33.3)  | 0         | 11 (91.7)  | 0         | 0       | 1 (8.3)   | 0         |
| Omega fatty acids             | 21 (2.0)   | 7 (33.3)   | 0         | 10 (47.6) | 4 (19.0)  | 0         | 13 (61.9)  | 4 (19.0)  | 0       | 2 (9.5)   | 2 (9.5)   |
| Other vitamins/minerals       | 177 (16.8) | 86 (48.6)  | 8 (4.5)   | 56 (31.6) | 19 (10.7) | 8 (4.5)   | 111 (62.7) | 27 (15.3) | 1 (0.6) | 21 (11.9) | 17 (9.6)  |



---

|                               |          |          |   |           |          |   |           |         |         |        |         |
|-------------------------------|----------|----------|---|-----------|----------|---|-----------|---------|---------|--------|---------|
| Unspecified by the respondent | 23 (2.2) | 5 (21.7) | 0 | 14 (60.9) | 4 (17.4) | 0 | 18 (78.3) | 1 (4.3) | 1 (4.3) | 1(4.3) | 2 (8.7) |
|-------------------------------|----------|----------|---|-----------|----------|---|-----------|---------|---------|--------|---------|

---

Date are presented as: <sup>a</sup> n(%);<sup>#</sup> percentages are calculated in relation to the total sample population; <sup>##</sup> percentages are calculated in relation to the number of people using a given health care provider;

71  
72
